# Supplementary material for: n-3 polyunsaturated fatty acids regulate chemerin in cultured adipocytes: role of GPR120 and derived lipid mediators
Source: Royal Society of Chemistry journal article supplement (doi:10.1039/d0fo01445a), 2020-01-01
Supplement: d0fo01445a1.pdf [file d0fo01445a1.pdf]

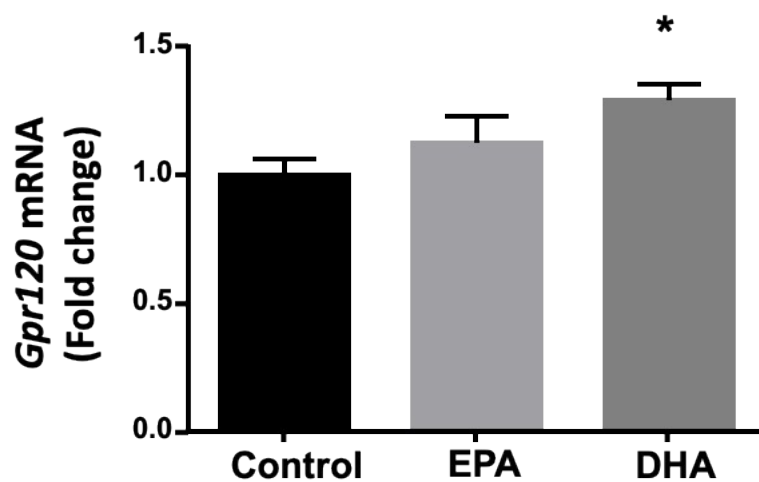

**SUPPLEMENTAL FIGURE 1.** Effects of EPA and DHA on *Gpr120* gene expression levels in 3T3-L1 adipocytes. Fully differentiated 3T3-L1 adipocytes were treated with EPA and DHA (200  $\mu$ M) during 24 h, and *Gpr120* mRNA levels were determined. Data are expressed as mean  $\pm$  SEM of three independent experiments. \* $p < 0.05$  vs. Control (vehicle-treated cells).
